# Supplementary material for: A Double-Blind, Placebo-Controlled Trial to Evaluate the Safety, Tolerability, and Pharmacokinetics of Single, Escalating Oral Doses of JDTic
Source: PubMed Central journal article supplement — Neuropsychopharmacology. 2015 Mar 4;40(9):2059–65. doi: 10.1038/npp.2015.27 (PMC4613600; doi:10.1038/npp.2015.27), 2015-03-04

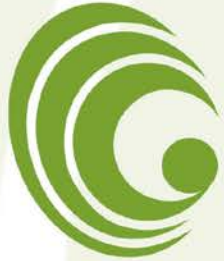

**CELLular**  
**Dynamics**  
international

# **xCELLigence Testing for RTI**

*06Apr2012*

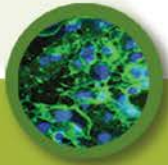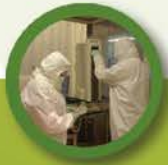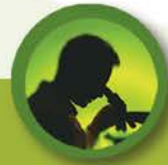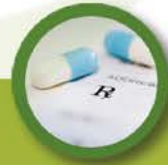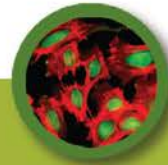

## **Methods Overview**

- **Cell Culture**
- **Recording Layout**
- **Data Analysis**

## **Results**

- **Controls**
- **JDTic**

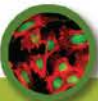

# Methods

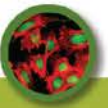

## 1. Overview

- a. JDTic and Terfenadine were provided in vehicle at 1000X. Vehicle alone also provided.
- b. JDTic and controls diluted according to RTI's instructions

## 2. Method

- a. Thaw cardiomyocytes according to User's Guide
  - i. 0.1% Gelatin coated 6-well dish at 750K plated cardiomyocytes/well
- b. Maintain in culture for 7 days according to User's Guide
- c. Dissociate using 0.1% Trypsin and re-plate on RTCA cardio plate at 40,000 viable cells/well
- d. Change the medium 48 hours after dissociation
- e. Allow fresh medium to equilibrate for at least 2 hours
- f. Record baseline, apply compounds for record according to RTI's requirements

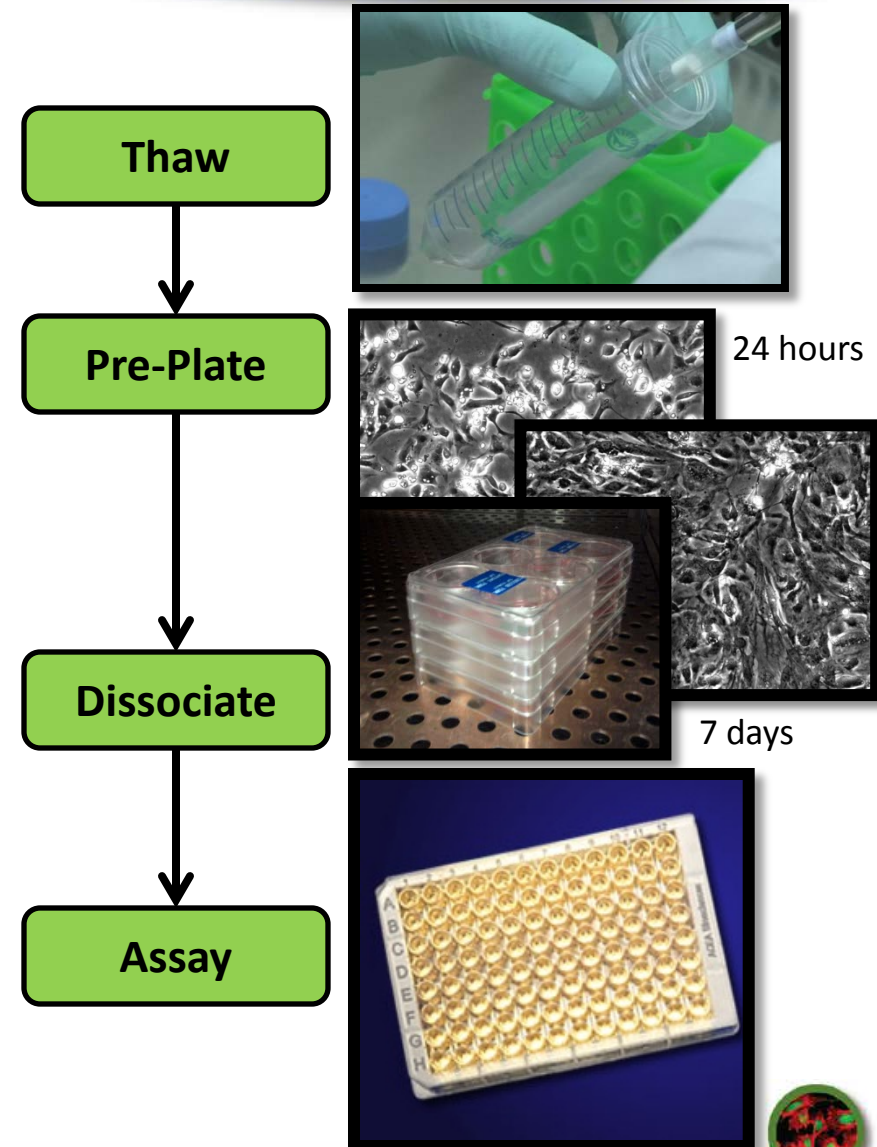

1. **Baseline recorded before compound addition**
2. **Acute response recorded immediately after compound addition for 1 hour**
3. **Non-acute response recorded every hour for 23 hours**
4. **RTI requested baseline, 30min, 1hr, 4hr, and 16hr time points to be analyzed**

### Recording Parameters

| Time       | Step Duration | Sweep Interval | Sweep Duration |
|------------|---------------|----------------|----------------|
| Baseline   | 30 min        | 5 min          | 60 sec         |
| Dosing     | 60 min        | 1 min          | 60 sec         |
| Every Hour | 22 hr         | 1 min          | 60 sec         |

### 5. Plate Layout

- a. **8-point dose response curve, 10-fold dilution, n=4**
- b. **4 negative controls wells in vehicle (0.1% DMSO or water), 4-point E4031 dose response (3, 10, 30, 100nM n=3) and Terfenadine (1uM, 300nM, 100nM, 30nM) for positive control**
- c. **Add 20µl of a 10x solution to 180µl iCMM in bath. Mix 3 times**

|   | 1     | 2            | 3            | 4            | 5            | 6            | 7            | 8            | 9            | 10          | 11          | 12    |
|---|-------|--------------|--------------|--------------|--------------|--------------|--------------|--------------|--------------|-------------|-------------|-------|
| A | Media | Media        | Media        | Media        | Media        | Media        | Media        | Media        | Media        | Media       | Media       | Media |
| B | Media | JDTic Dose 1 | JDTic Dose 2 | JDTic Dose 3 | JDTic Dose 4 | JDTic Dose 5 | JDTic Dose 6 | JDTic Dose 7 | JDTic Dose 8 | Terf. 1uM   | E4031 100nM | Media |
| C | Media | JDTic Dose 1 | JDTic Dose 2 | JDTic Dose 3 | JDTic Dose 4 | JDTic Dose 5 | JDTic Dose 6 | JDTic Dose 7 | JDTic Dose 8 | Terf. 300nM | E4031 30nM  | Media |
| D | Media | JDTic Dose 1 | JDTic Dose 2 | JDTic Dose 3 | JDTic Dose 4 | JDTic Dose 5 | JDTic Dose 6 | JDTic Dose 7 | JDTic Dose 8 | Terf. 100nM | E4031 10nM  | Media |
| E | Media | JDTic Dose 1 | JDTic Dose 2 | JDTic Dose 3 | JDTic Dose 4 | JDTic Dose 5 | JDTic Dose 6 | JDTic Dose 7 | JDTic Dose 8 | Terf. 30nM  | E4031 3nM   | Media |
| F | Media | DMSO 0.10%   | DMSO 0.10%   | Terf. 1uM    | Terf. 300nM  | Terf. 100nM  | Terf. 30nM   | Terf. 1uM    | Terf. 300nM  | Terf. 100nM | Terf. 30nM  | Media |
| G | Media | DMSO 0.10%   | DMSO 0.10%   | E4031 100nM  | E4031 30nM   | E4031 10nM   | E4031 3nM    | E4031 100nM  | E4031 30nM   | E4031 10nM  | E4031 3nM   | Media |
| H | Media | Media        | Media        | Media        | Media        | Media        | Media        | Media        | Media        | Media       | Media       | Media |



## Control

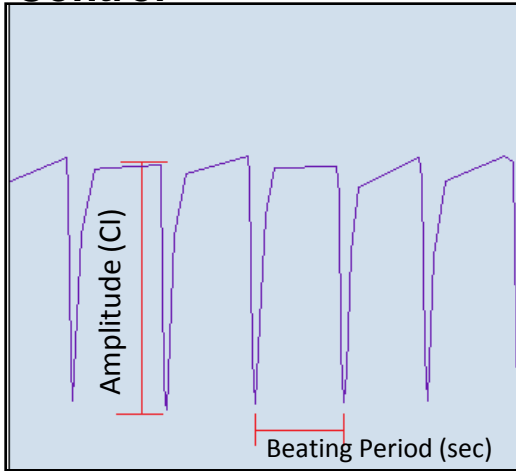

- **Beating Period and Amplitude were measured with RTCA software.**
- **CV was calculated from RTCA values and standard deviations**
- **Beating Period was converted to Beating Frequency**
- **Beating Frequency and Amplitude were normalized to Baseline**

## Compound

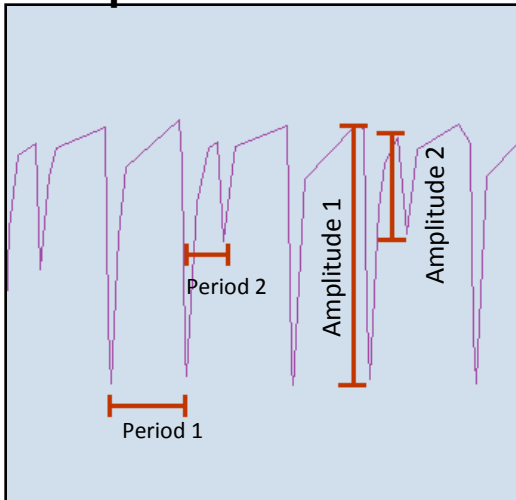

### Example:

- **Small deflections are detected as a beat by RTCA software.**
- **The differences in Periods and Amplitudes increase the standard deviation, lowers the average, thus increasing CV.**
- **Alternatively Periods and Amplitudes can change to steady-state levels with little change in CV**
- **Drug effects can thus be detected by changes in CV and/or Mean values**



# Results



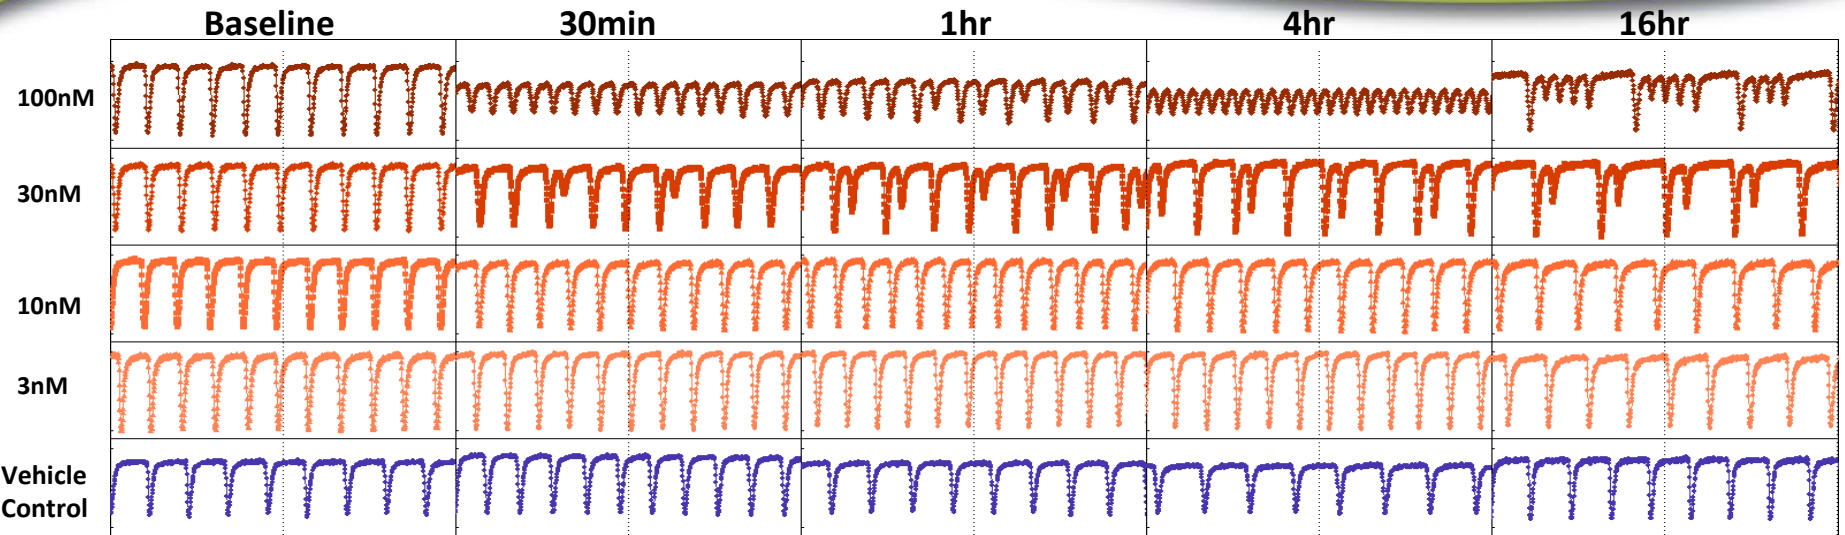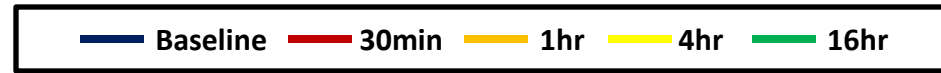

Beating Frequency (Hz):  
Normalized Average

Beating Period (sec): CV

Amplitude: Normalized  
Average

Amplitude: CV

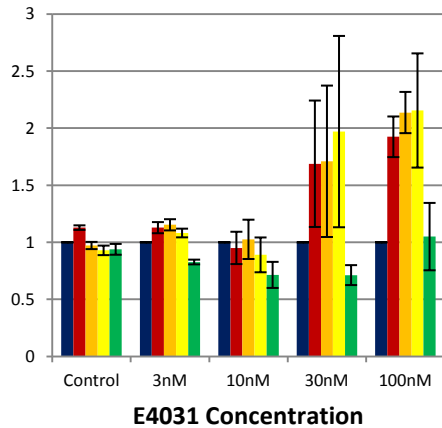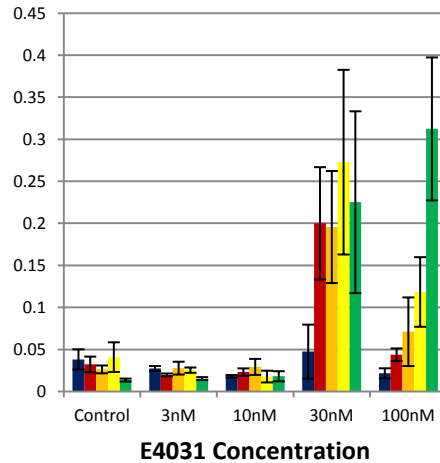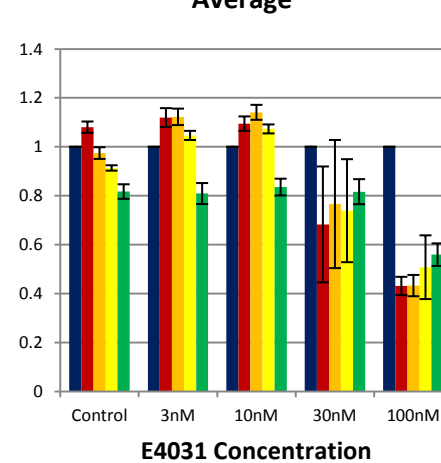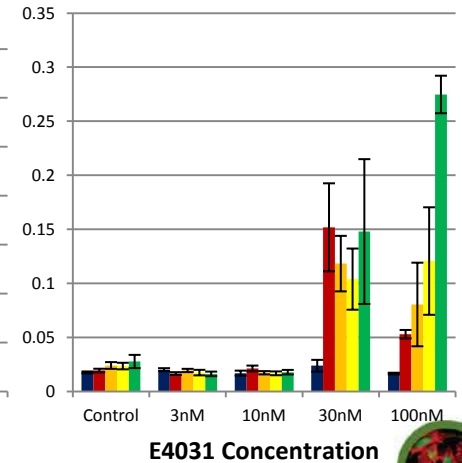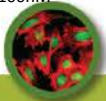



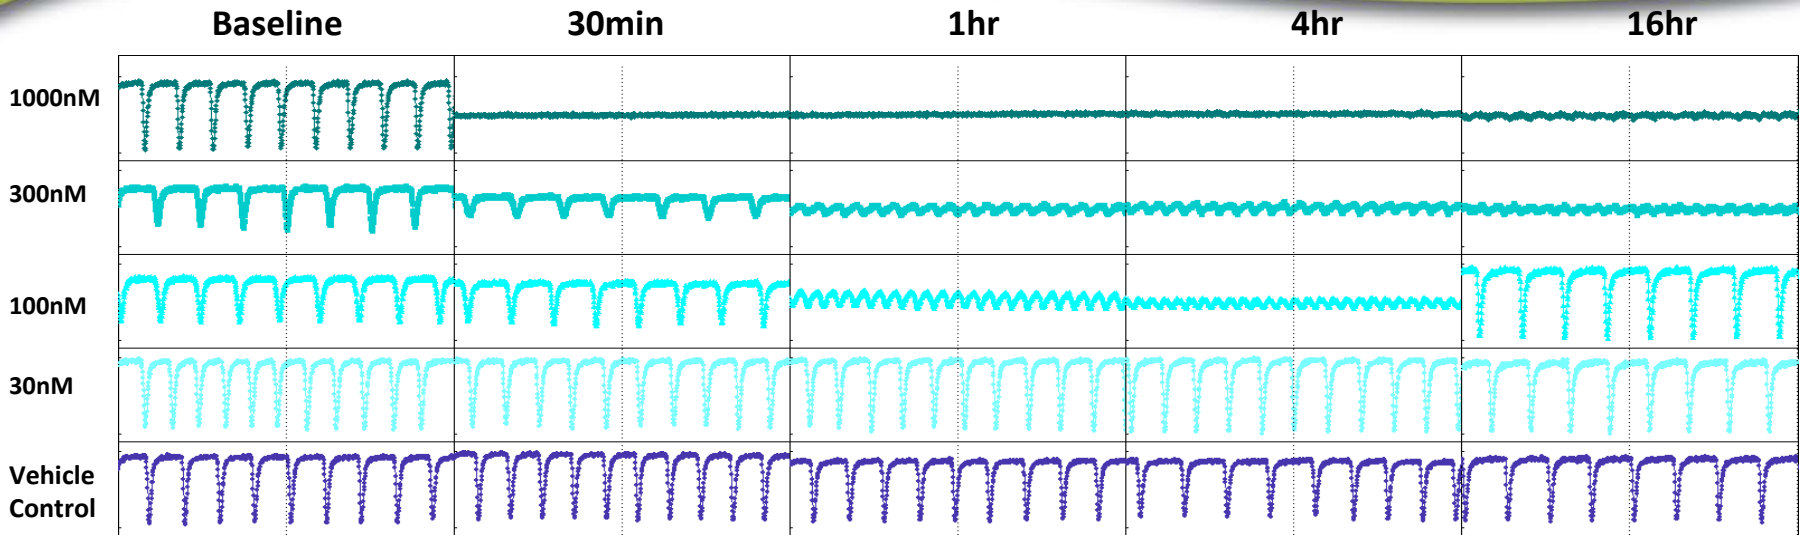

**Beating Frequency (Hz):  
Normalized Average**

**Beating Period (sec): CV**

**Amplitude: Normalized  
Average**

**Amplitude: CV**

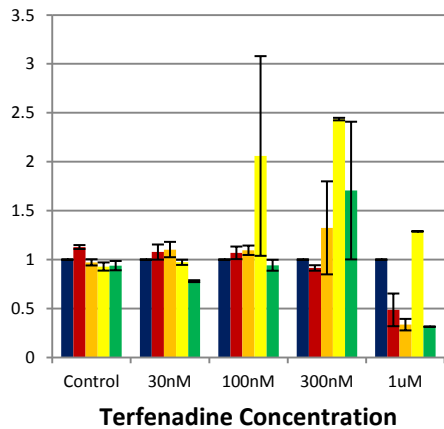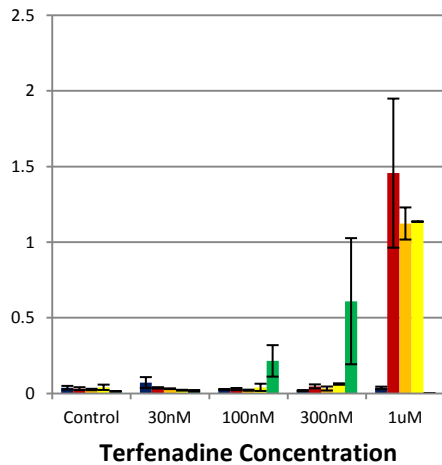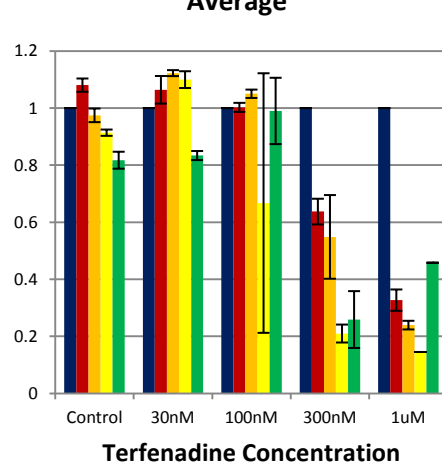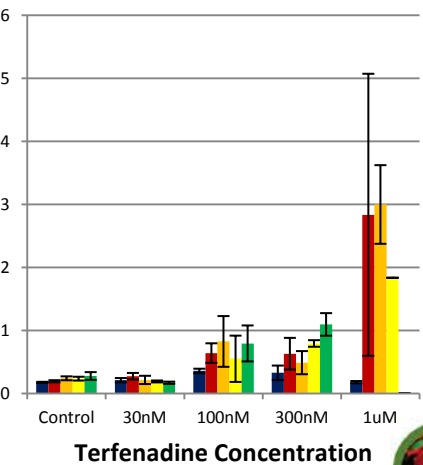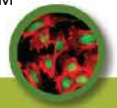

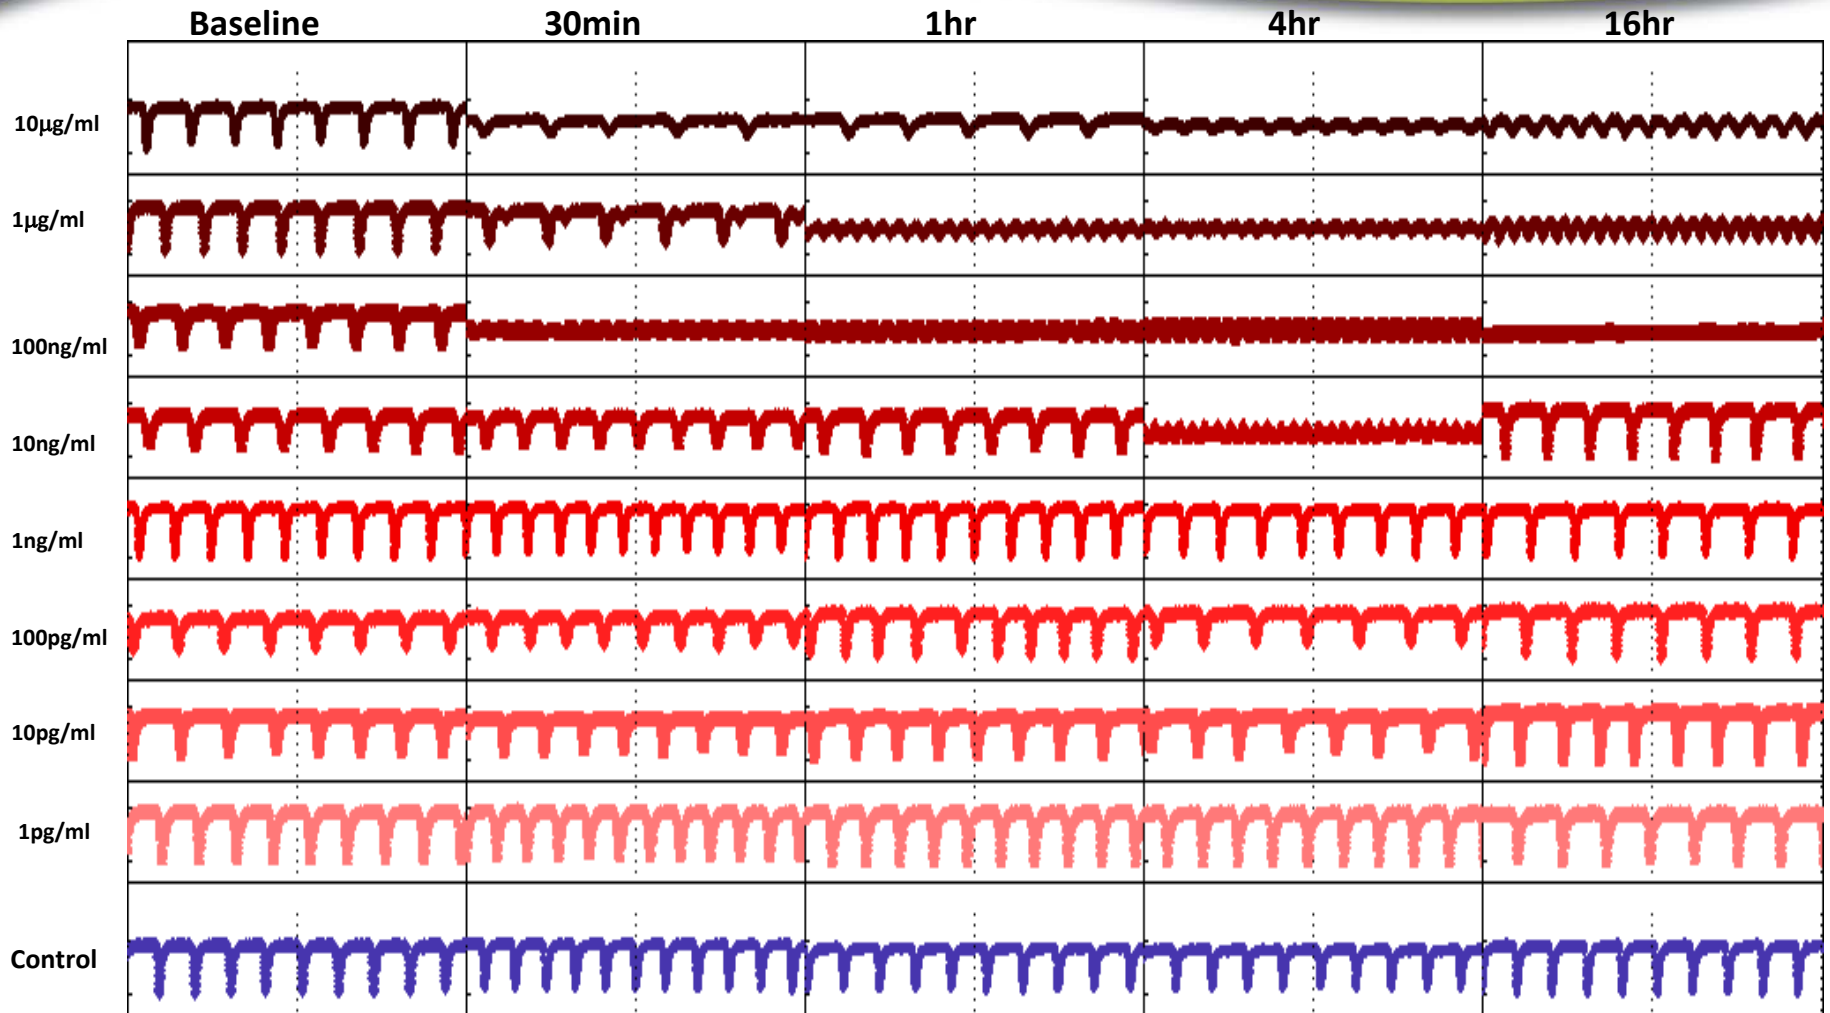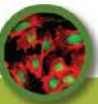

**Beating Frequency (Hz): Normalized Average**

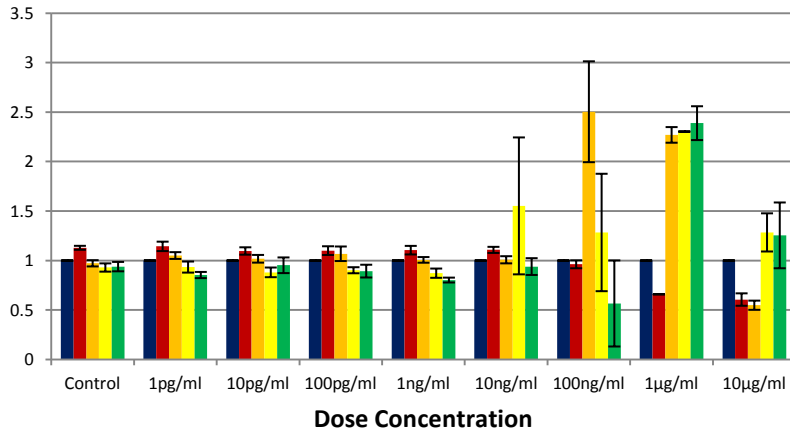

**Amplitude: Normalized Average**

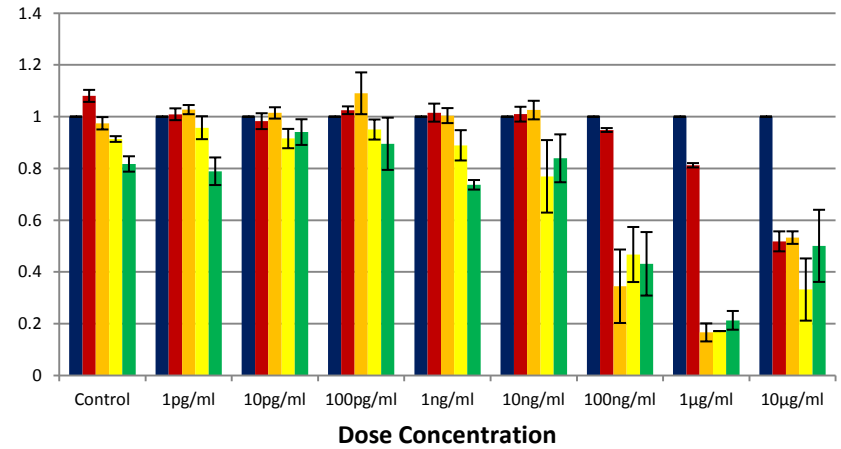

**Beating Period (sec): CV**

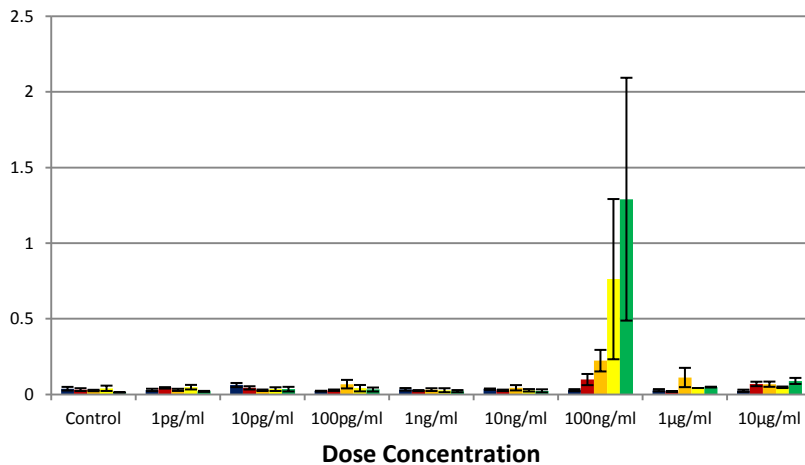

**Amplitude: CV**

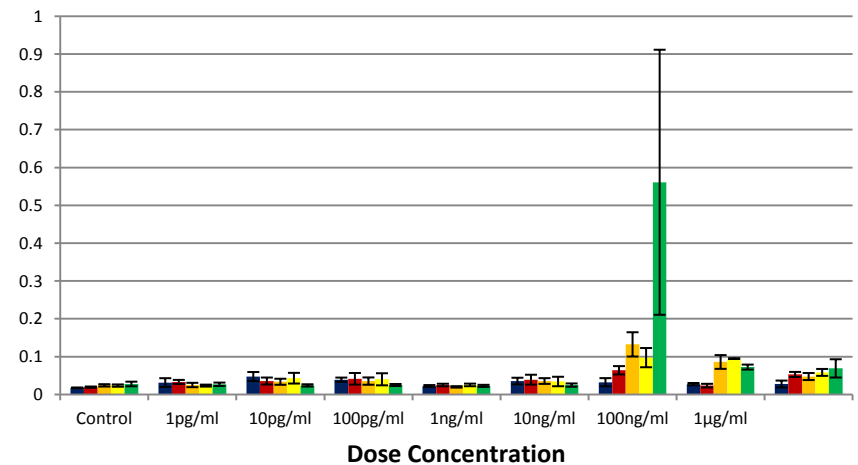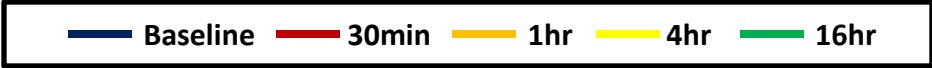

- **Positive and negative controls displayed expected responses**
  - **E4031: clear effects at 100 and 30 nM at all time points post drug addition**
  - **Terfenadine: clear effects at 1000, 300 and 100 nM**
    - 100 nM effects observed at 1 and 4 hours, but recovered by 16 hours
  - **Vehicle Control: no effects detected**
- **JDTic had a clear effect at high concentrations**
  - **Clear effects at 10 ug/mL, 1 ug/mL and 100 ng/mL at all time points**
  - **Response at 10ng/ml variable by time point**
  - **IB20**
    - Between 10 and 100 ng/mL at 30 minutes, 1 hour and 16 hour time points post dose application
    - Between 1 and 10 ng/mL at 4 hours post dose application

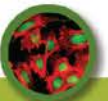

Supplement: npp201527x1.pdf [file npp201527x1.pdf]
